# Supplementary material for: Gentiopicroside improves non-alcoholic steatohepatitis by activating PPARα and suppressing HIF1
Source: PubMed Central journal article supplement (PMC10956515; doi:10.3389/fphar.2024.1335814), 2024-03-07

a

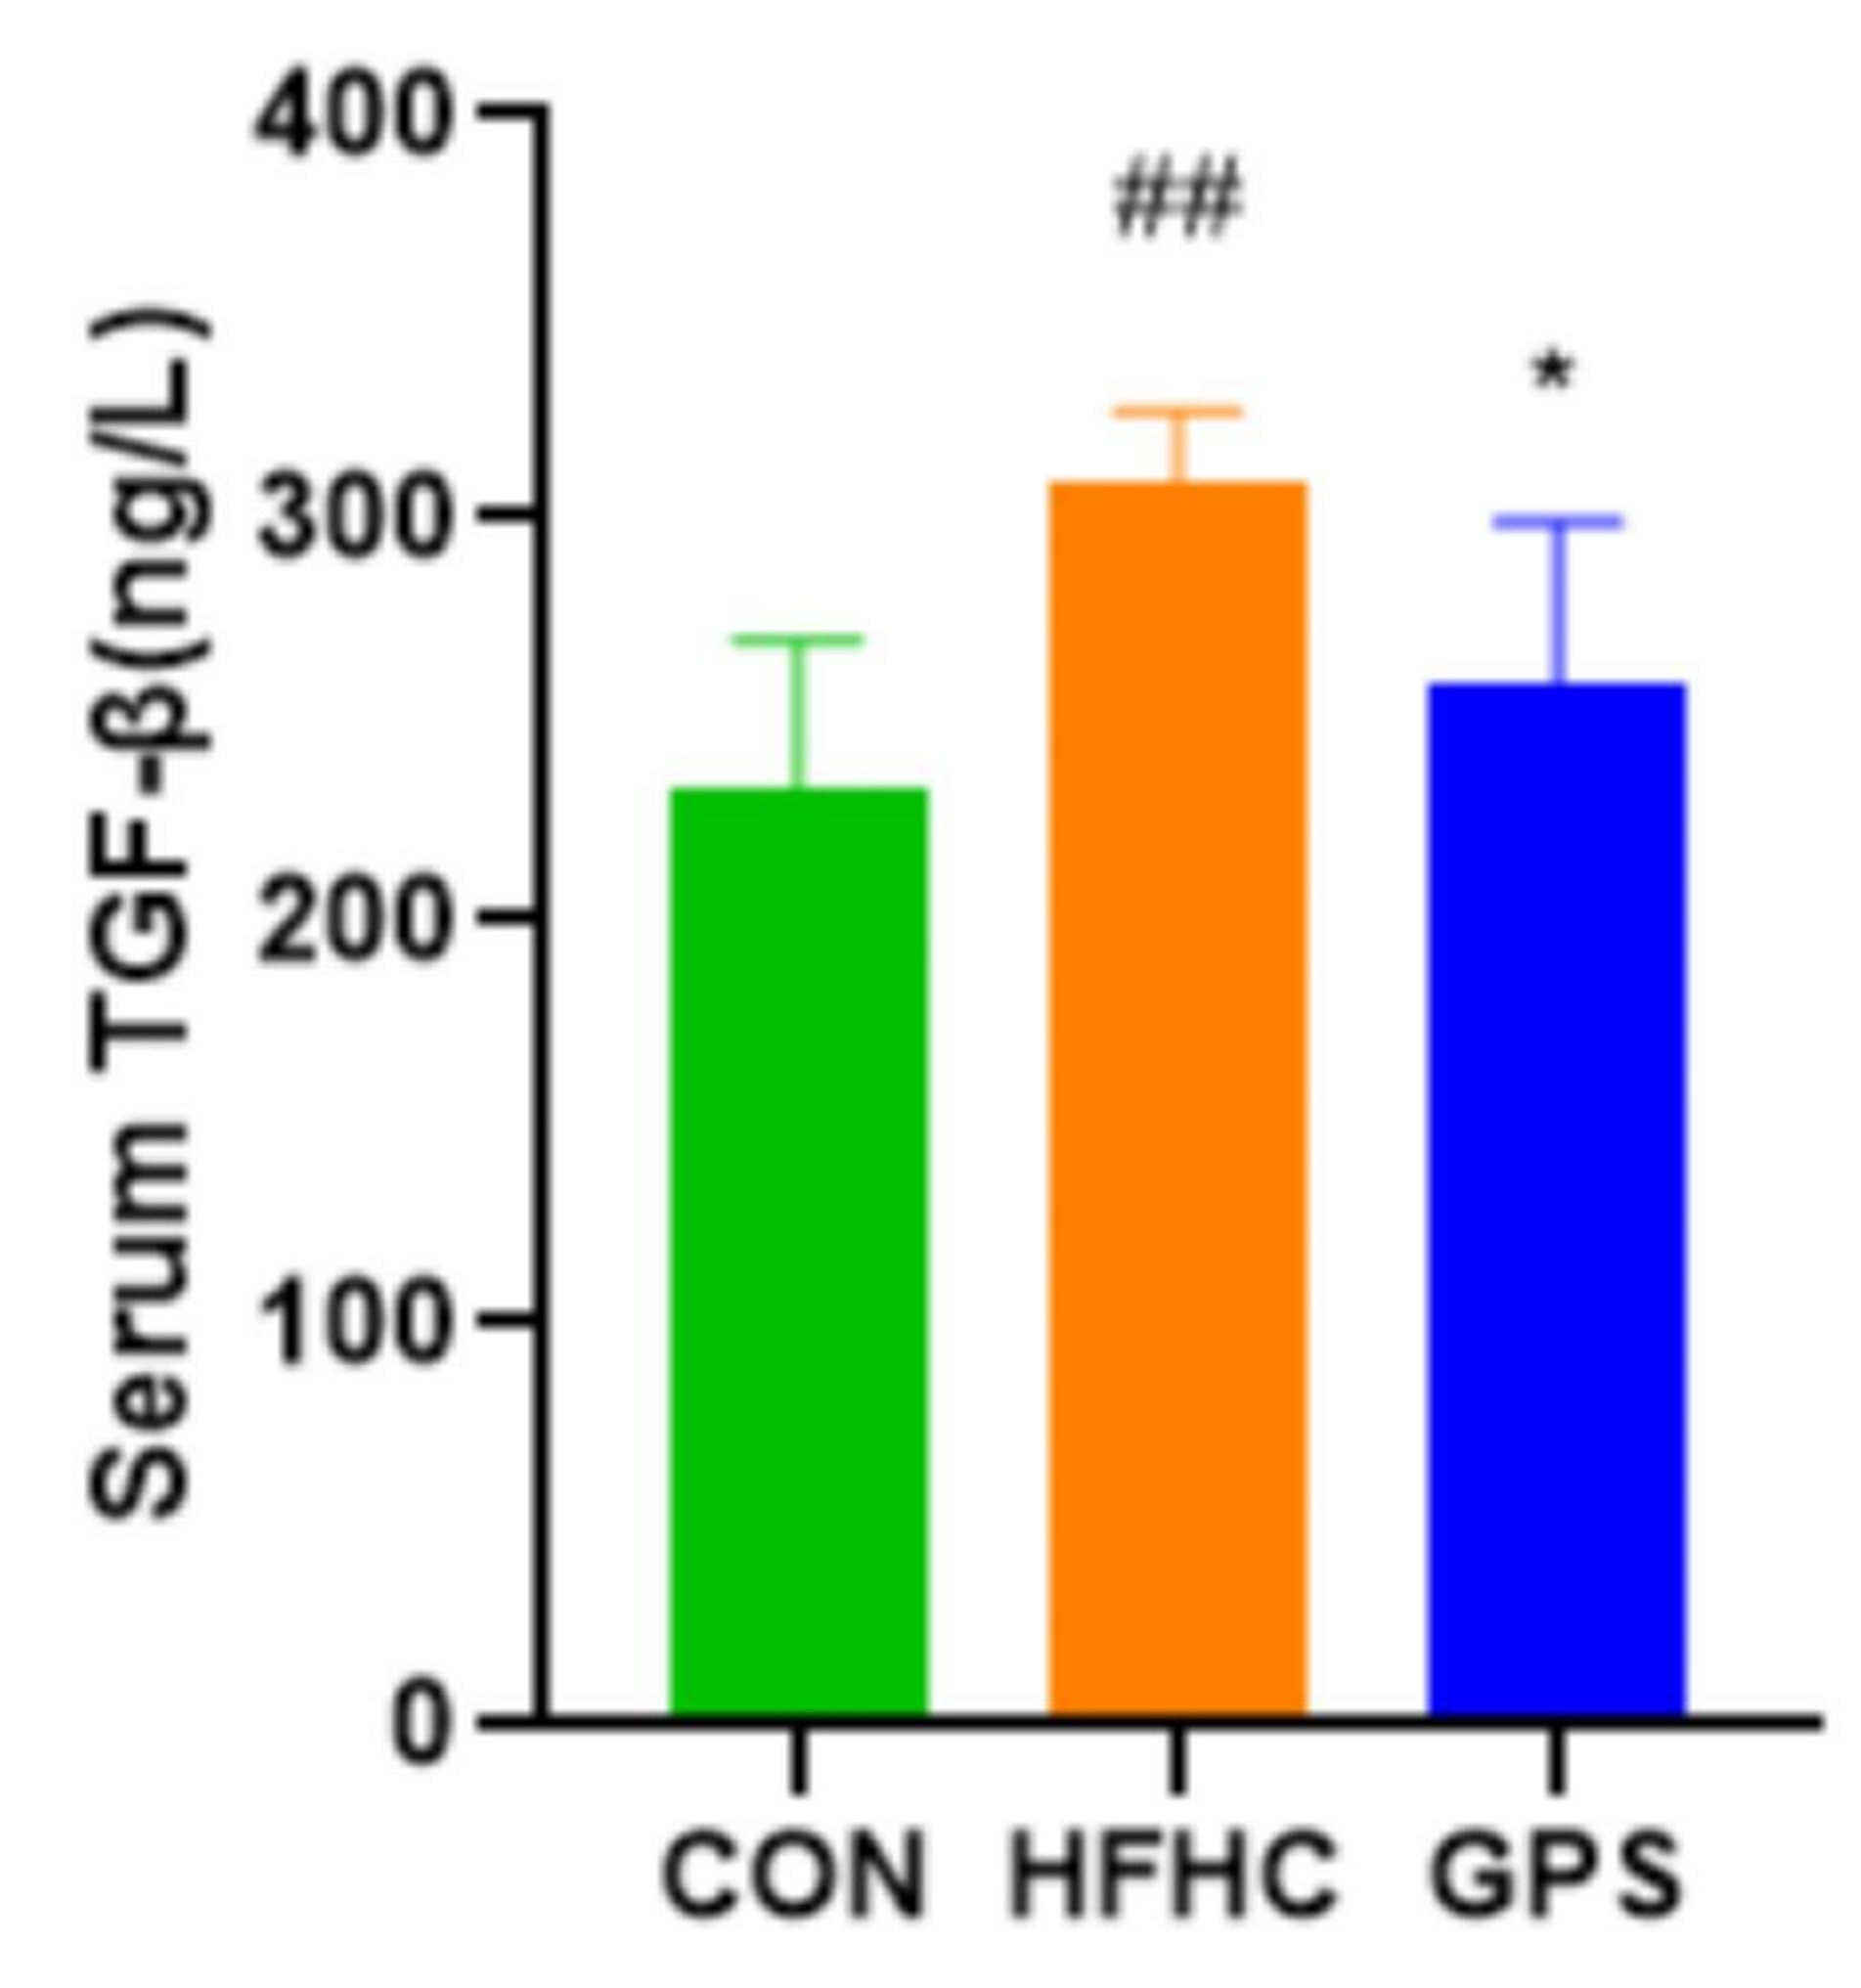

b

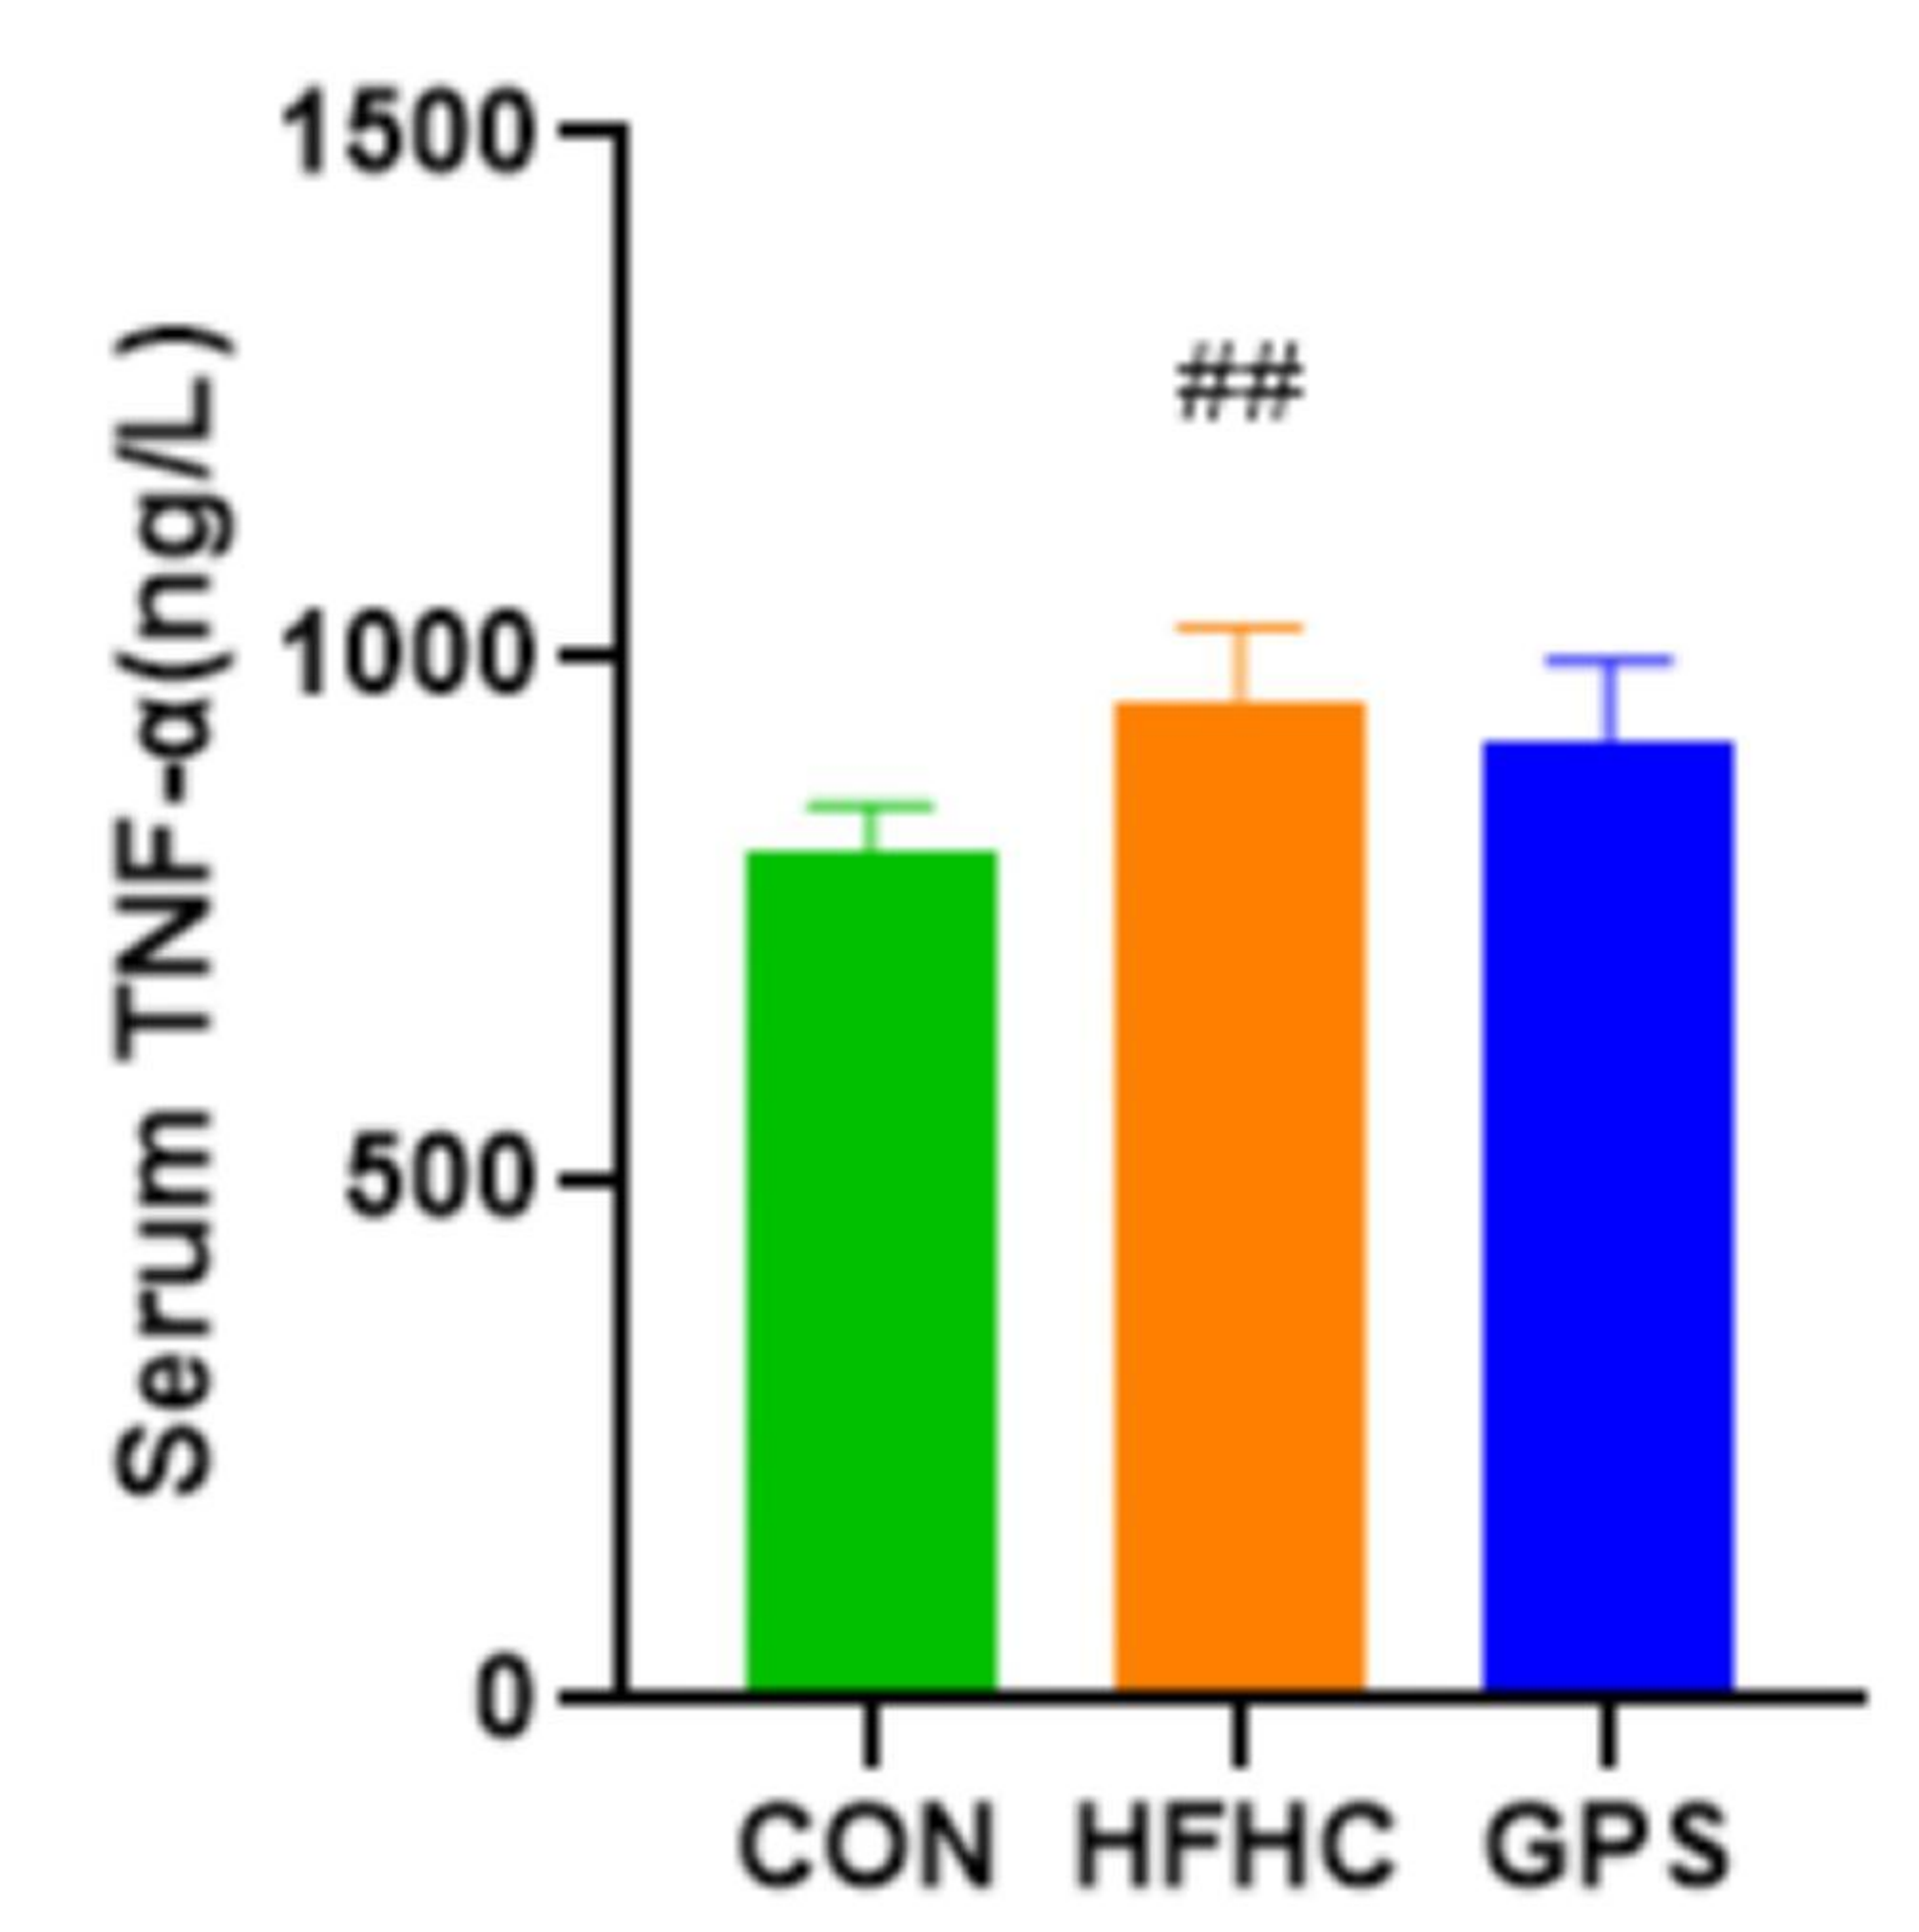

Supplement: Image1.pdf [file Image1.pdf]
