# Supplementary material for: Gentiopicroside improves non-alcoholic steatohepatitis by activating PPARα and suppressing HIF1
Source: PubMed Central journal article supplement (PMC10956515; doi:10.3389/fphar.2024.1335814), 2024-03-07

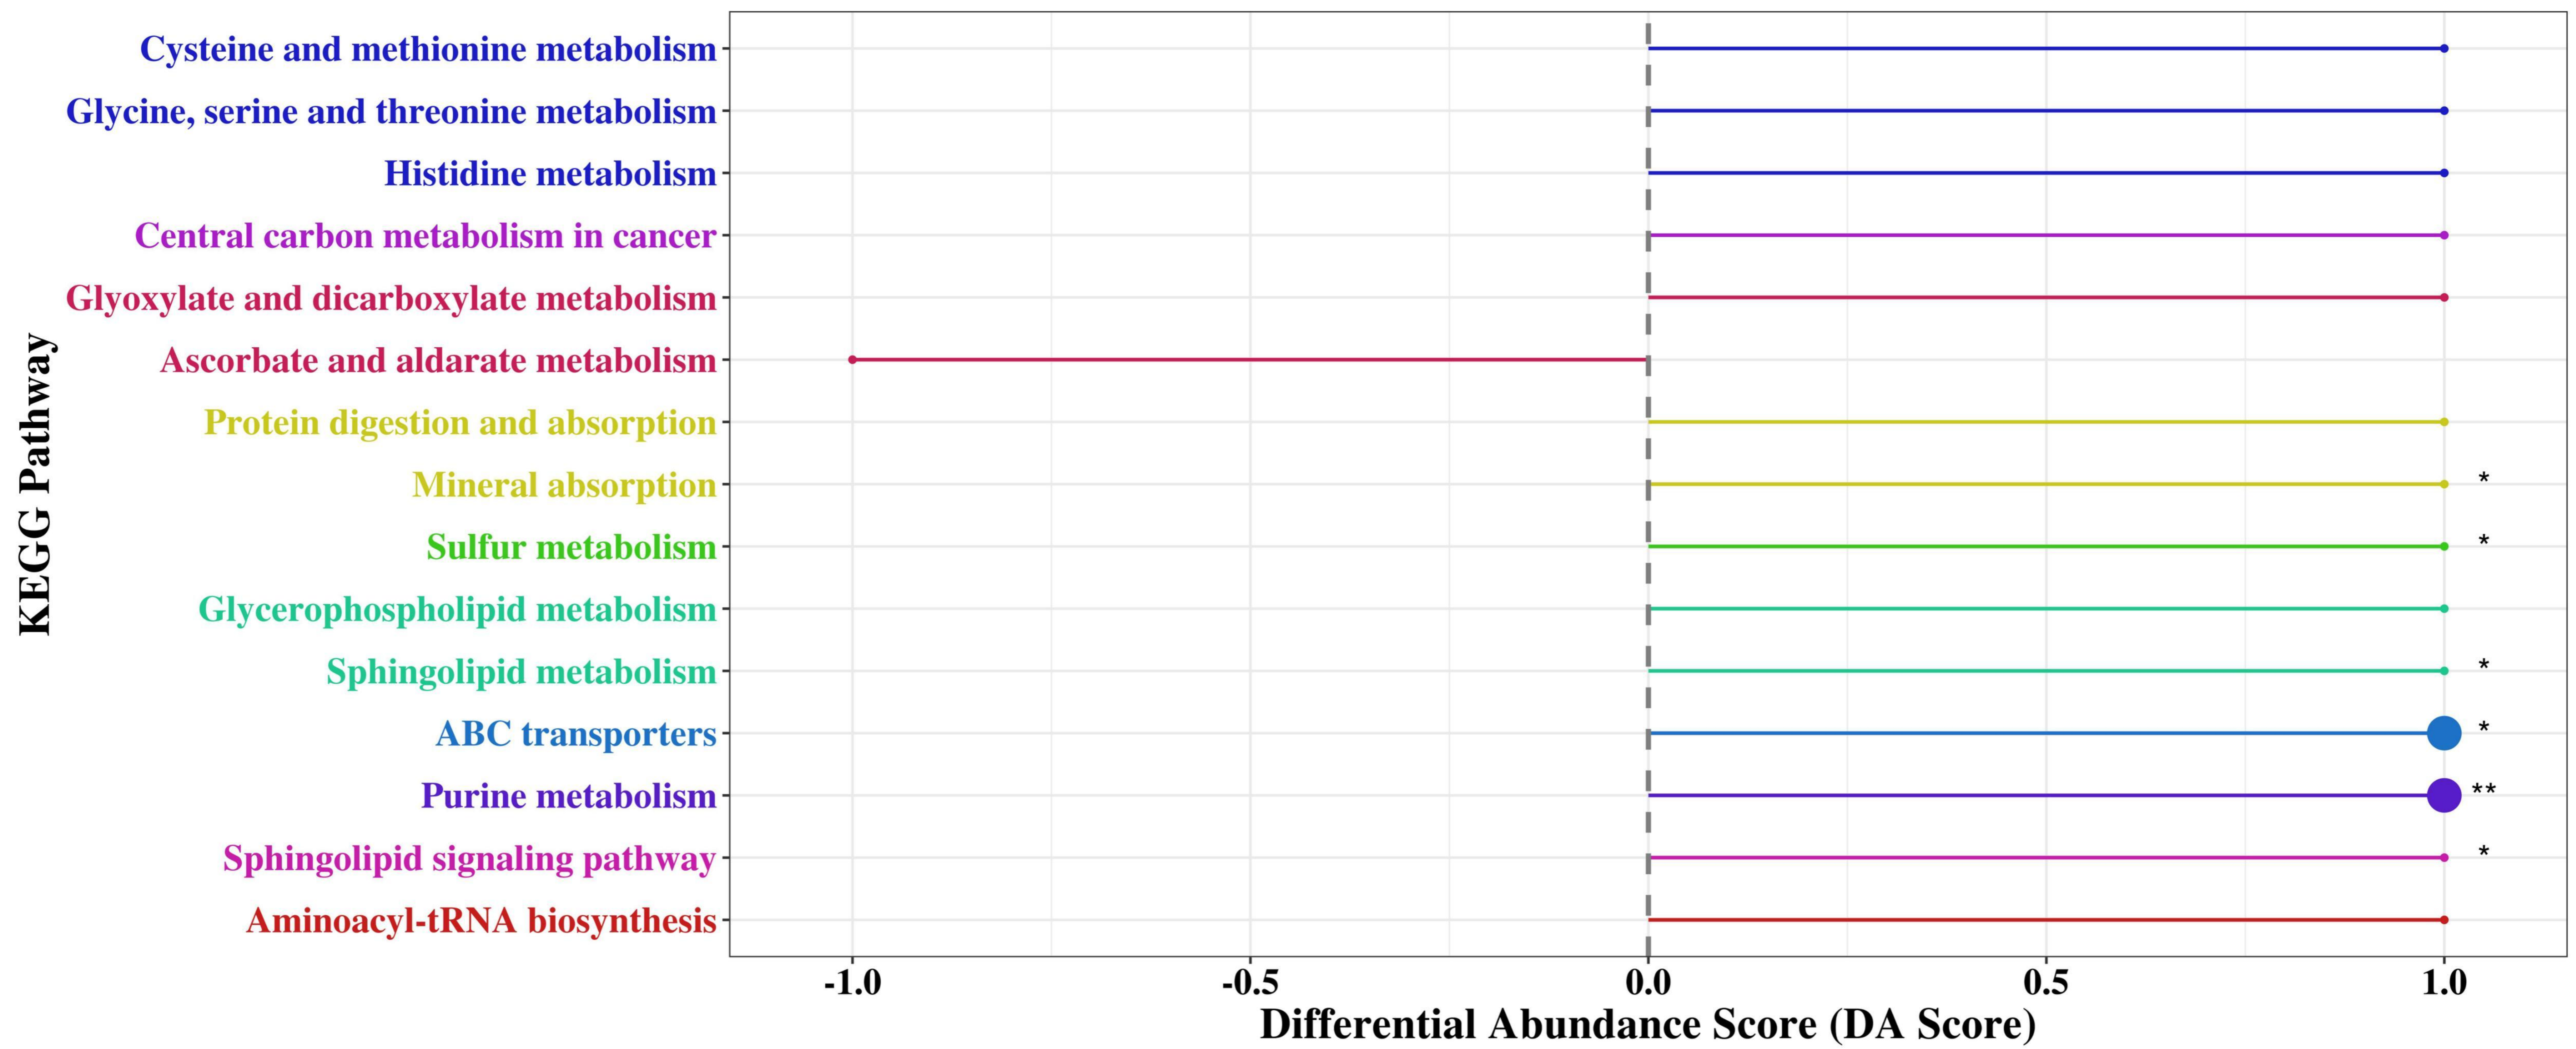

Count

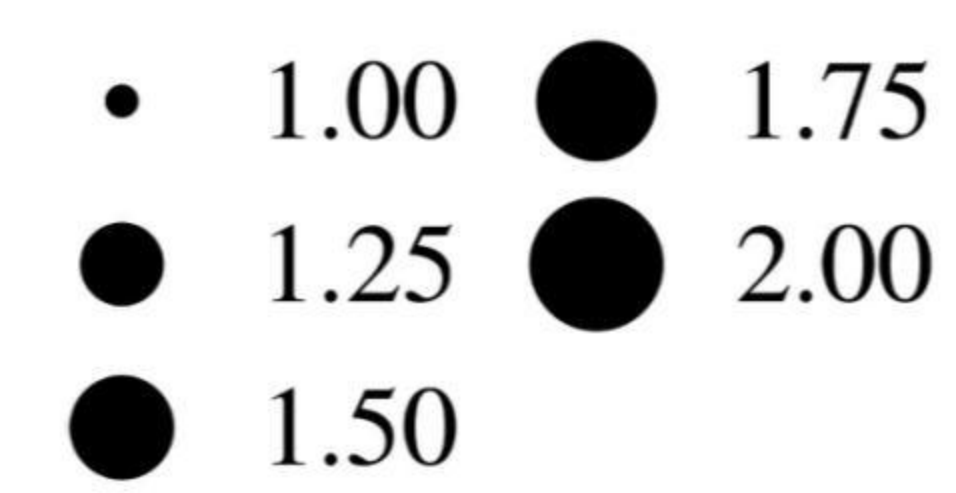

KEGG.class

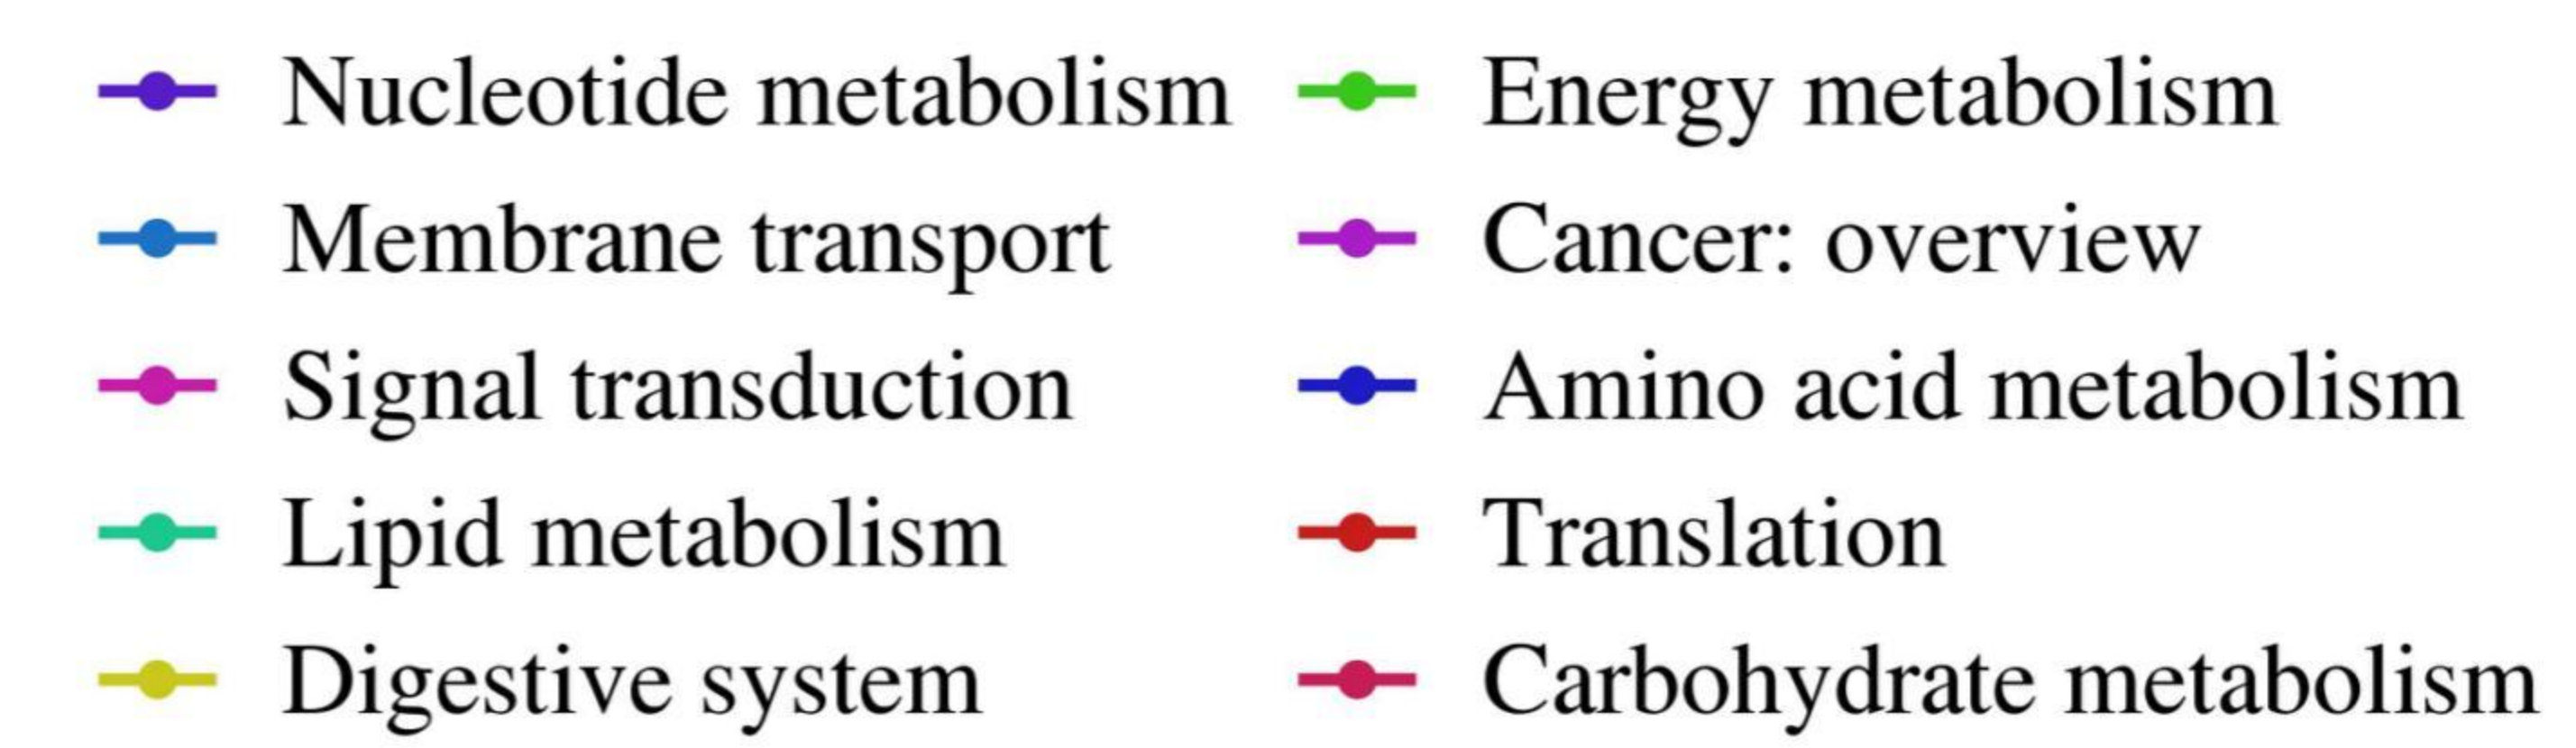

Supplement: Image3.pdf [file Image3.pdf]
